# Supplementary material for: Age-Dependent Metabolomic Profile of the Follicular Fluids From Women Undergoing Assisted Reproductive Technology Treatment
Source: PubMed Central journal article supplement (PMC8888916; doi:10.3389/fendo.2022.818888), 2022-02-16
Supplement: DataSheet_1.pdf [file DataSheet_1.pdf]

**Supplementary Table S1. Differences in metabolite levels in the advanced age group, compared with the young age group.**

| No. | Pathway      | Sub Pathway                                      | PubChem CID | Biochemical name              | Fold change (A/C) <sup>a</sup> | Change direction | <i>p</i> -value (t-test) <sup>b</sup> | <i>q</i> -value (FDR-adjusted) <sup>c</sup> |
|-----|--------------|--------------------------------------------------|-------------|-------------------------------|--------------------------------|------------------|---------------------------------------|---------------------------------------------|
| 1   | Amino Acid   | Alanine and Aspartate Metabolism                 | 5950        | alanine                       | 1.48                           | Up               | 0.0420                                | 0.2075                                      |
| 2   | Amino Acid   | Creatine Metabolism                              | 586         | creatine                      | 1.38                           | Up               | 0.0005                                | <b>0.0290</b>                               |
| 3   | Amino Acid   | Glutamate Metabolism                             | 5961        | glutamine                     | 1.19                           | Up               | 0.0029                                | 0.0598                                      |
| 4   | Amino Acid   | Glutathione Metabolism                           | 7405        | 5-oxoproline                  | 1.20                           | Up               | 0.0068                                | 0.0877                                      |
| 5   | Amino Acid   | Glycine, Serine and Threonine Metabolism         | 673         | dimethylglycine               | 1.26                           | Up               | 0.0427                                | 0.2077                                      |
| 6   | Amino Acid   | Glycine, Serine and Threonine Metabolism         | 750         | glycine                       | 1.32                           | Up               | 0.0447                                | 0.2086                                      |
| 7   | Amino Acid   | Histidine Metabolism                             | 6274        | histidine                     | 1.24                           | Up               | 0.0006                                | <b>0.0290</b>                               |
| 8   | Amino Acid   | Leucine, Isoleucine and Valine Metabolism        | 6426901     | 2-methylbutyrylcarnitine (C5) | 1.47                           | Up               | 0.0019                                | 0.0565                                      |
| 9   | Amino Acid   | Leucine, Isoleucine and Valine Metabolism        | 6426851     | isovalerylcarnitine           | 1.54                           | Up               | 0.0212                                | 0.1560                                      |
| 10  | Amino Acid   | Leucine, Isoleucine and Valine Metabolism        | 6287        | valine                        | 1.22                           | Up               | 0.0055                                | 0.0854                                      |
| 11  | Amino Acid   | Lysine Metabolism                                | 5962        | lysine                        | 1.34                           | Up               | 0.0263                                | 0.1614                                      |
| 12  | Amino Acid   | Lysine Metabolism                                | 92832       | N6-acetyllysine               | 1.18                           | Up               | 0.0439                                | 0.2086                                      |
| 13  | Amino Acid   | Methionine, Cysteine, SAM and Taurine Metabolism | 6137        | methionine                    | 1.51                           | Up               | 0.0001                                | <b>0.0153</b>                               |
| 14  | Amino Acid   | Phenylalanine and Tyrosine Metabolism            | 6140        | phenylalanine                 | 1.18                           | Up               | 0.0227                                | 0.1560                                      |
| 15  | Amino Acid   | Phenylalanine and Tyrosine Metabolism            | 6057        | tyrosine                      | 1.30                           | Up               | 0.0020                                | 0.0565                                      |
| 16  | Amino Acid   | Urea cycle; Arginine and Proline Metabolism      | 9750        | citrulline                    | 1.34                           | Up               | 0.0025                                | 0.0598                                      |
| 17  | Amino Acid   | Urea cycle; Arginine and Proline Metabolism      | 6262        | ornithine                     | 1.27                           | Up               | 0.0231                                | 0.1560                                      |
| 18  | Amino Acid   | Urea cycle; Arginine and Proline Metabolism      | 145742      | proline                       | 1.22                           | Up               | 0.0369                                | 0.1946                                      |
| 19  | Amino Acid   | Urea cycle; Arginine and Proline Metabolism      | 5810        | trans-4-hydroxyproline        | 1.58                           | Up               | 0.0009                                | <b>0.0375</b>                               |
| 20  | Amino Acid   | Urea cycle; Arginine and Proline Metabolism      | 1176        | urea                          | 1.52                           | Up               | 0.0089                                | 0.0950                                      |
| 21  | Carbohydrate | Aminosugar Metabolism                            | 2781043     | erythronate*                  | 1.25                           | Up               | 0.0081                                | 0.0947                                      |

|    |                        |                                                      |          |                                                      |      |      |        |               |
|----|------------------------|------------------------------------------------------|----------|------------------------------------------------------|------|------|--------|---------------|
| 22 | Carbohydrate           | Fructose, Mannose and Galactose Metabolism           | 6251     | mannitol                                             | 1.26 | Up   | 0.0487 | 0.2168        |
| 23 | Carbohydrate           | Glycolysis, Gluconeogenesis, and Pyruvate Metabolism | 612      | lactate                                              | 1.35 | Up   | 0.0082 | 0.0947        |
| 24 | Carbohydrate           | Pentose Metabolism                                   | 94154    | arabitol                                             | 1.22 | Up   | 0.0384 | 0.1990        |
| 25 | Carbohydrate           | Pentose Metabolism                                   | 6602431  | xylonate                                             | 1.48 | Up   | 0.0015 | 0.0518        |
| 26 | Cofactors and Vitamins | Tocopherol Metabolism                                | 14985    | alpha-tocopherol                                     | 1.57 | Up   | 0.0228 | 0.1560        |
| 27 | Energy                 | TCA Cycle                                            | 525      | malate                                               | 1.37 | Up   | 0.0064 | 0.0877        |
| 28 | Energy                 | TCA Cycle                                            | 1110     | succinate                                            | 1.18 | Up   | 0.0086 | 0.0950        |
| 29 | Lipid                  | Carnitine Metabolism                                 | 134      | deoxycarnitine                                       | 1.28 | Up   | 0.0045 | 0.0752        |
| 30 | Lipid                  | Fatty Acid Metabolism (also BCAA Metabolism)         | 439829   | butyrylcarnitine                                     | 1.30 | Up   | 0.0480 | 0.2168        |
| 31 | Lipid                  | Fatty Acid Metabolism (also BCAA Metabolism)         | 107738   | propionylcarnitine                                   | 1.29 | Up   | 0.0289 | 0.1648        |
| 32 | Lipid                  | Fatty Acid Metabolism(Acyl Carnitine)                |          | cis-4-decenoyl carnitine                             | 1.50 | Up   | 0.0123 | 0.1194        |
| 33 | Lipid                  | Fatty Acid Metabolism(Acyl Carnitine)                | 10245190 | decanoylcarnitine                                    | 1.41 | Up   | 0.0413 | 0.2070        |
| 34 | Lipid                  | Fatty Acid Metabolism(Acyl Carnitine)                | 123701   | octanoylcarnitine                                    | 1.58 | Up   | 0.0270 | 0.1614        |
| 35 | Lipid                  | Fatty Acid, Branched                                 | 12587    | isocaproate                                          | 1.31 | Up   | 0.0251 | 0.1614        |
| 36 | Lipid                  | Fatty Acid, Dicarboxylate                            | 123979   | 3-carboxy-4-methyl-5-propyl-2-furanpropanoate (CMPF) | 2.15 | Up   | 0.0205 | 0.1560        |
| 37 | Lipid                  | Glycerolipid Metabolism                              | 754      | glycerol 3-phosphate                                 | 1.24 | Up   | 0.0292 | 0.1648        |
| 38 | Lipid                  | Ketone Bodies                                        | 96       | acetoacetate                                         | 0.46 | Down | 0.0225 | 0.1560        |
| 39 | Lipid                  | Lysolipid                                            |          | 1-stearoyl-GPI (18:0)                                | 1.17 | Up   | 0.0403 | 0.2054        |
| 40 | Lipid                  | Medium Chain Fatty Acid                              | 8892     | caproate (6:0)                                       | 1.33 | Up   | 0.0169 | 0.1351        |
| 41 | Lipid                  | Mevalonate Metabolism                                | 439230   | mevalonate                                           | 1.45 | Up   | 0.0001 | <b>0.0153</b> |
| 42 | Lipid                  | Phospholipid Metabolism                              | 305      | choline                                              | 1.62 | Up   | 0.0001 | <b>0.0153</b> |
| 43 | Lipid                  | Polyunsaturated Fatty Acid (n3 and n6)               | 445580   | docosahexaenoate (DHA; 22:6n3)                       | 1.33 | Up   | 0.0270 | 0.1614        |

|    |            |                                                      |        |                                                |      |      |        |               |
|----|------------|------------------------------------------------------|--------|------------------------------------------------|------|------|--------|---------------|
| 44 | Lipid      | Polyunsaturated Fatty Acid (n3 and n6)               | 446284 | eicosapentaenoate (EPA; 20:5n3)                | 1.74 | Up   | 0.0035 | 0.0669        |
| 45 | Lipid      | Steroid                                              | 6238   | 17-alpha-hydroxyprogesterone                   | 1.87 | Up   | 0.0037 | 0.0669        |
| 46 | Lipid      | Steroid                                              | 134595 | 21-hydroxypregnenolone disulfate               | 0.60 | Down | 0.0164 | 0.1341        |
| 47 | Lipid      | Steroid                                              | 10634  | 4-androsten-3beta,17beta-diol disulfate (1)*   | 1.76 | Up   | 0.0256 | 0.1614        |
| 48 | Lipid      | Steroid                                              | 242332 | 5alpha-androstan-3beta,17beta-diol disulfate   | 2.20 | Up   | 0.0278 | 0.1629        |
| 49 | Lipid      | Steroid                                              |        | 5alpha-pregnan-3alpha,20beta-diol disulfate 1* | 0.48 | Down | 0.0094 | 0.0976        |
| 50 | Lipid      | Steroid                                              |        | 5alpha-pregnan-3beta,20alpha-diol disulfate    | 0.52 | Down | 0.0104 | 0.1046        |
| 51 | Lipid      | Steroid                                              | 66416  | beta-estradiol 3-sulfate                       | 2.26 | Up   | 0.0060 | 0.0877        |
| 52 | Lipid      | Steroid                                              | 5754   | cortisol                                       | 0.77 | Down | 0.0140 | 0.1245        |
| 53 | Lipid      | Steroid                                              | 5881   | dehydroepiandrosterone                         | 1.41 | Up   | 0.0228 | 0.1560        |
| 54 | Lipid      | Steroid                                              | 5757   | estradiol                                      | 1.58 | Up   | 0.0449 | 0.2086        |
| 55 | Lipid      | Steroid                                              |        | pregn steroid monosulfate*                     | 0.57 | Down | 0.0027 | 0.0598        |
| 56 | Lipid      | Steroid                                              | 123796 | pregnanediol-3-glucuronide                     | 0.55 | Down | 0.0162 | 0.1341        |
| 57 | Lipid      | Steroid                                              |        | pregnen-diol disulfate*                        | 0.56 | Down | 0.0488 | 0.2168        |
| 58 | Lipid      | Steroid                                              | 5994   | progesterone                                   | 1.34 | Up   | 0.0319 | 0.1769        |
| 59 | Nucleotide | Purine Metabolism, (Hypo)Xanthine/Inosine containing | 6021   | inosine                                        | 1.63 | Up   | 0.0238 | 0.1575        |
| 60 | Nucleotide | Purine Metabolism, Guanine containing                | 92919  | N2,N2-dimethylguanosine                        | 1.37 | Up   | 0.0010 | <b>0.0375</b> |
| 61 | Nucleotide | Pyrimidine Metabolism, Orotate containing            | 648    | dihydroorotate                                 | 1.34 | Up   | 0.0081 | 0.0947        |
| 62 | Nucleotide | Pyrimidine Metabolism, Thymine containing            | 1135   | thymine                                        | 0.59 | Down | 0.0341 | 0.1863        |
| 63 | Nucleotide | Pyrimidine Metabolism, Uracil containing             | 445408 | 5-methyluridine (ribothymidine)                | 1.22 | Up   | 0.0133 | 0.1218        |

|    |             |                                          |         |                        |      |      |        |               |
|----|-------------|------------------------------------------|---------|------------------------|------|------|--------|---------------|
| 64 | Nucleotide  | Pyrimidine Metabolism, Uracil containing | 6029    | uridine                | 1.35 | Up   | 0.0066 | 0.0877        |
| 65 | Peptide     | Gamma-glutamyl Amino Acid                | 151023  | gamma-glutamylleucine  | 1.18 | Up   | 0.0127 | 0.1194        |
| 66 | Peptide     | Gamma-glutamyl Amino Acid                | 94340   | gamma-glutamyltyrosine | 1.35 | Up   | 0.0029 | 0.0598        |
| 67 | Peptide     | Gamma-glutamyl Amino Acid                | 7015683 | gamma-glutamylvaline   | 1.46 | Up   | 0.0002 | <b>0.0186</b> |
| 68 | Xenobiotics | Chemical                                 | 23831   | HEPES                  | 0.43 | Down | 0.0159 | 0.1341        |
| 69 | Xenobiotics | Chemical                                 | 4766    | phenol red             | 0.43 | Down | 0.0351 | 0.1881        |
| 70 | Xenobiotics | Food Component/Plant                     | 222285  | erythritol             | 1.24 | Up   | 0.0046 | 0.0752        |

<sup>a</sup> Fold change is calculated as the mean levels of metabolites in the advanced age group, relative to those in the young control group. A/C, the advanced age group/ the young control group.

<sup>b</sup> Levels of metabolites between the advanced age group and young control group were compared with the t-test.

<sup>c</sup> The *q*-value was estimated by the false discovery rate (FDR) approach to take into account the multiple comparisons.
